# Supplementary material
Source: MDPI journal article supplement (https://www.mdpi.com/1999-4907/14/4/743)
Supplement: s1 [file s1]

## Supplementary materials

**Table S1.** Variations of basal DCR [13], MS [14] and QL [15] media tested at different stages of *Cryptomeria japonica* micropropagation process, Experiment 1.

| Stage           | Basal medium                    | PGRs ( $\mu\text{M}$ ) | Sucrose (w/v) | AC ( $\text{g L}^{-1}$ ) | Agar ( $\text{g L}^{-1}$ )               |
|-----------------|---------------------------------|------------------------|---------------|--------------------------|------------------------------------------|
| Induction       | DCR                             | BA (8.8)               | 3%            | -                        | Difco Agar <sup>®</sup> granulated (8)   |
| Induction       | MS                              | BA (8.8)               | 3%            | -                        | Difco Agar <sup>®</sup> granulated (8)   |
| Induction       | QL                              | BA (8.8)               | 3%            | -                        | Difco Agar <sup>®</sup> granulated (8)   |
| Elongation      | DCR                             | -                      | 3%            | (2)                      | Difco Agar <sup>®</sup> granulated (8.5) |
| Elongation      | MS                              | -                      | 3%            | (2)                      | Difco Agar <sup>®</sup> granulated (8.5) |
| Elongation      | QL                              | -                      | 3%            | (2)                      | Difco Agar <sup>®</sup> granulated (8.5) |
| Rooting         | Half strength macronutrients QL | NAA (50)               | 3%            | -                        | Difco Agar <sup>®</sup> granulated (8)   |
| Rooting         | Half strength macronutrients QL | NAA (50)               | 1.5%          | -                        | Difco Agar <sup>®</sup> granulated (8)   |
| Root expression | Half strength macronutrients QL | -                      | 3%            | (2)                      | Difco Agar <sup>®</sup> granulated (8.5) |
| Root expression | Half strength macronutrients QL | -                      | 1.5%          | (2)                      | Difco Agar <sup>®</sup> granulated (8.5) |

PGRs, plant growth regulators; BA, 6-benzyladenine; NAA, 1-naphthalenacetic acid; AC, activated charcoal.

**Table S2.** Variations of basal QL [15] medium tested at different stages of *Cryptomeria japonica* micropropagation process, Experiment 2.

| Stage           | Basal medium                    | PGRs ( $\mu\text{M}$ ) | Sucrose (w/v) | AC ( $\text{g L}^{-1}$ ) | Agar ( $\text{g L}^{-1}$ )   |
|-----------------|---------------------------------|------------------------|---------------|--------------------------|------------------------------|
| Induction       | QL                              | BA (8.8)               | 3%            | -                        | Difco Agar® granulated (8)   |
| Induction       | QL                              | m-T (8.8)              | 3%            | -                        | Difco Agar® granulated (8)   |
| Induction       | QL                              | TDZ (8.8)              | 3%            | -                        | Difco Agar® granulated (8)   |
| Elongation      | QL                              | -                      | 3%            | (2)                      | Difco Agar® granulated (8.5) |
| Rooting         | Half strength macronutrients QL | NAA (50)               | 1.5%          | -                        | Difco Agar® granulated (8)   |
| Root expression | Half strength macronutrients QL | -                      | 1.5%          | (2)                      | Difco Agar® granulated (8.5) |

PGRs, plant growth regulators; BA, 6-benzyladenine; m-T, meta-topolin; thidiazuron, TDZ; NAA, 1-naphthalenacetic acid; AC, activated charcoal.

**Table S3.** Statistical analysis for the survival (%) showed in *Cryptomeria japonica* per explant type (apical explants of >1.5 cm in length, apical explants of <1.0 cm length, basal explants of >1.5 cm length, and basal explants of <1.0 cm in length) and basal media (DCR [Gupta and Durzan, 1985], MS [Murashige and Skoog, 1962] and QL [Quoirin and Lepoivre, 1977]).

| Source           | df | Survival (%)        |                      |
|------------------|----|---------------------|----------------------|
|                  |    | X <sup>2</sup> Test | p-Value              |
| Explant type (E) | 3  | 492.11              | <0.05*               |
| Basal media (B)  | 2  | 490.60              | ≥0.05 <sup>n.s</sup> |
| B x C            | 6  | 490.60              | ≥0.05 <sup>n.s</sup> |

\*Significantly different at  $p < 0.05$ , <sup>n.s</sup> Non-significant at  $p < 0.05$ , df Degrees of freedom.

**Table S4.** Statistical analysis for shoot induction (%) and number of shoots per explant showed in *Cryptomeria japonica* per explant type (apical explants of >1.5 cm in length, apical explants of <1.0 cm length, basal explants of >1.5 cm length, and basal explants of <1.0 cm in length) and basal media (DCR [Gupta and Durzan, 1985], MS [Murashige and Skoog, 1962] and QL [Quoirin and Lepoivre, 1977]).

| Source           | df | Shoot induction (%) |           | N° shoots /explant |         |
|------------------|----|---------------------|-----------|--------------------|---------|
|                  |    | X <sup>2</sup> Test | p-Value   | F Test             | p-Value |
| Explant type (E) | 3  | 266.95              | <0.05*    | 4.31               | <0.05*  |
| Basal media (B)  | 2  | 266.00              | ≥0.05 n.s | 9.09               | <0.05*  |
| E x B            | 6  | 256.35              | ≥0.05 n.s | 2.59               | <0.05*  |

\*Significantly different at  $p < 0.05$ , n.s Non-significant at  $p < 0.05$ , df Degrees of freedom.

**Table S5.** Statistical analysis for root induction (%), number roots per explant and length of longest of *Cryptomeria japonica* shoots cultured in QL medium [Quoirin and Lepoivre, 1977]), supplemented with 3% (w/v) sucrose or 1.5% (w/v) sucrose, according to light treatment.

| Source                    | df | Root induction (%)  |           | N° roots /explant |           | Length of longest root |           |
|---------------------------|----|---------------------|-----------|-------------------|-----------|------------------------|-----------|
|                           |    | X <sup>2</sup> Test | p-Value   | F Test            | p-Value   | F Test                 | p-Value   |
| Sucrose concentration (S) | 1  | 152.78              | ≥0.05 n.s | 1.38              | <0.05 n.s | 4.13                   | <0.05*    |
| Light treatment (L)       | 1  | 149.44              | ≥0.05 n.s | 22.70             | <0.05*    | 4.8                    | <0.05*    |
| S x L                     | 1  | 149.44              | ≥0.05 n.s | 0.01              | ≥0.05 n.s | 0.30                   | ≥0.05 n.s |

\*Significantly different at  $p < 0.05$ , n.s Non-significant at  $p < 0.05$ , df Degrees of freedom.

**Table S6.** Statistical analysis for the survival (%) of rooted shoots propagated *in vitro* coming from *Cryptomeria japonica* adult trees, after four weeks under *ex vitro* conditions.

| Source                    | df | Survival (%)        |                      |
|---------------------------|----|---------------------|----------------------|
|                           |    | X <sup>2</sup> Test | p-Value              |
| Sucrose concentration (S) | 1  | 67.94               | ≥0.05 <sup>n.s</sup> |
| Light treatment (L)       | 1  | 67.07               | ≥0.05 <sup>n.s</sup> |
| S x L                     | 1  | 60.17               | <0.05*               |

\*Significantly different at  $p<0.05$ , <sup>n.s</sup> Non-significant at  $p<0.05$ , df Degrees of freedom.

**Table S7.** Statistical analysis for the survival (%) showed in *Cryptomeria japonica* explants (basal explants of >1.5 cm length) cultured in QL medium [Quoirin and Lepoivre, 1977]), supplemented with 6-benzyladenine (BA), *meta*-Topolin (*m*-T) and thidiazuron (TDZ) (8.8 µM).

| Source         | df | Survival (%)        |                      |
|----------------|----|---------------------|----------------------|
|                |    | X <sup>2</sup> Test | p-Value              |
| Cytokinin type | 2  | 703.95              | ≥0.05 <sup>n.s</sup> |

<sup>n.s</sup> Non-significant at  $p<0.05$ , df Degrees of freedom.

**Table S8.** Statistical analysis for shoot induction (%) and number of shoots per explant showed in *Cryptomeria japonica* explants (basal explants of >1.5 cm length) cultured in QL medium [Quoirin and Lepoivre, 1977]), supplemented with 6-benzyladenine (BA), *meta*-Topolin (*m*-T) and thidiazuron (TDZ) (8.8 µM).

| Source             | df | Shoot induction (%) |         | N° shoots /explant |                      |
|--------------------|----|---------------------|---------|--------------------|----------------------|
|                    |    | X <sup>2</sup> Test | p-Value | F Test             | p-Value              |
| Cytokinin type (E) | 1  | 405.51              | <0.05*  | 0.19               | ≥0.05 <sup>n.s</sup> |

\*Significantly different at  $p<0.05$ , <sup>n.s</sup> Non-significant at  $p<0.05$ , df Degrees of freedom.

**Table S9.** Statistical analysis for root induction (%), number root per explant and length of longest root showed in *Cryptomeria japonica* explants (basal explants of >1.5 cm length) cultured in QL medium [Quoirin and Lepoivre, 1977]), supplemented with 50  $\mu$ M 1-naphthaleneacetic acid (NAA), according to cytokinin type (6-benzyladenine (BA), *meta*-Topolin (*m*-T) and Thidiazuron (TDZ)) (8.8  $\mu$ M).

| Source         | df | Root induction      |                 | N <sup>o</sup> root /explant |                            | Length of longest root |                            |
|----------------|----|---------------------|-----------------|------------------------------|----------------------------|------------------------|----------------------------|
|                |    | X <sup>2</sup> Test | <i>p</i> -Value | <i>F</i> Test                | <i>p</i> -Value            | <i>F</i> Test          | <i>p</i> -Value            |
| Cytokinin type | 1  | 118.52              | <0.05*          | 0.70                         | $\geq 0.05$ <sup>n.s</sup> | 0.49                   | $\geq 0.05$ <sup>n.s</sup> |

\*Significantly different at  $p < 0.05$ , <sup>n.s</sup> Non-significant at  $p < 0.05$ , df Degrees of freedom.

**Table S10.** Statistical analysis for the survival (%) showed in *Cryptomeria japonica* explants (basal explants of >1.5 cm length) cultured in QL medium [Quoirin and Lepoivre, 1977]), supplemented with 50  $\mu$ M 1-naphthaleneacetic acid (NAA), according to cytokinin type (6-benzyladenine (BA) and *meta*-Topolin (*m*-T) (8.8  $\mu$ M)).

| Source         | df | Survival (%)        |                            |
|----------------|----|---------------------|----------------------------|
|                |    | X <sup>2</sup> Test | <i>p</i> -Value            |
| Cytokinin type | 1  | 14.53               | $\geq 0.05$ <sup>n.s</sup> |

<sup>s</sup> Non-significant at  $p < 0.05$ , df Degrees of freedom.
